# Supplementary material
Source: bioRxiv or medRxiv preprint supplement (https://www.medrxiv.org/highwire/filestream/77614/field_highwire_adjunct_files/1/2020.04.19.20068015-2.pdf)

**A**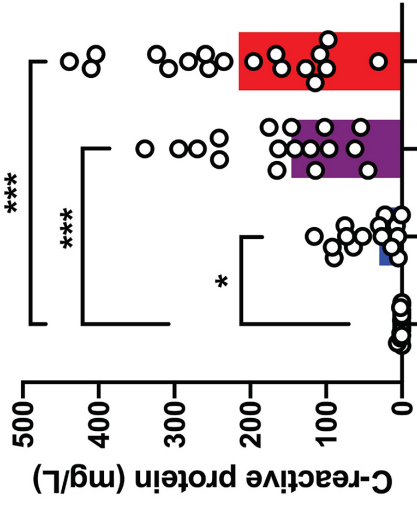**B**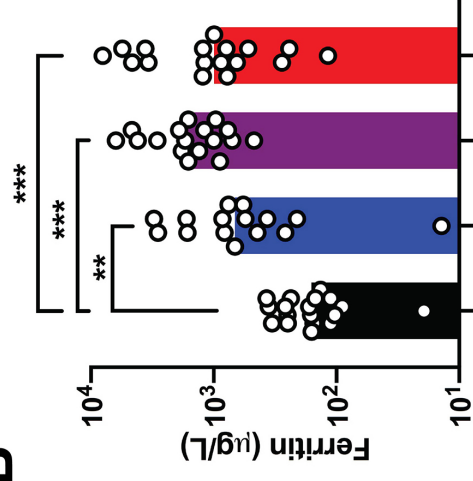**E**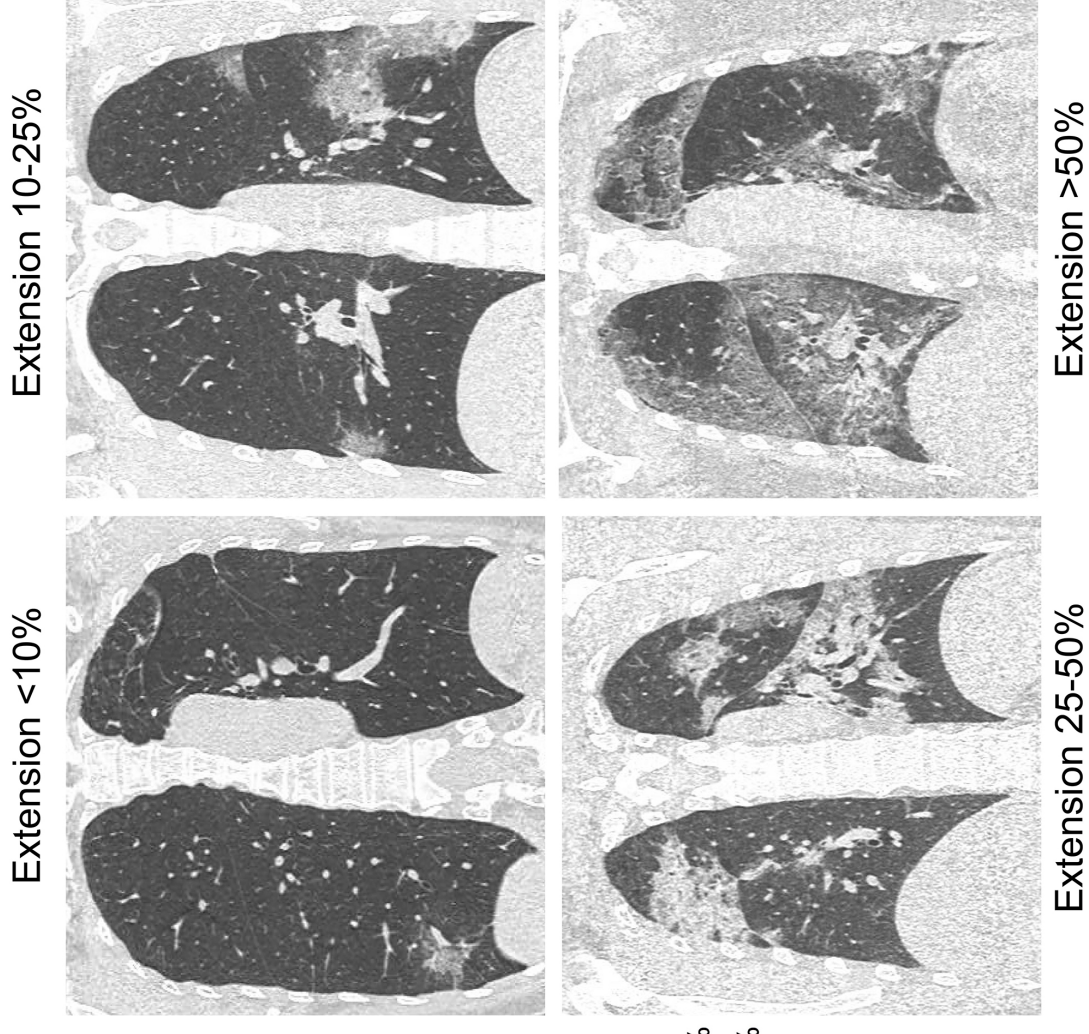**C**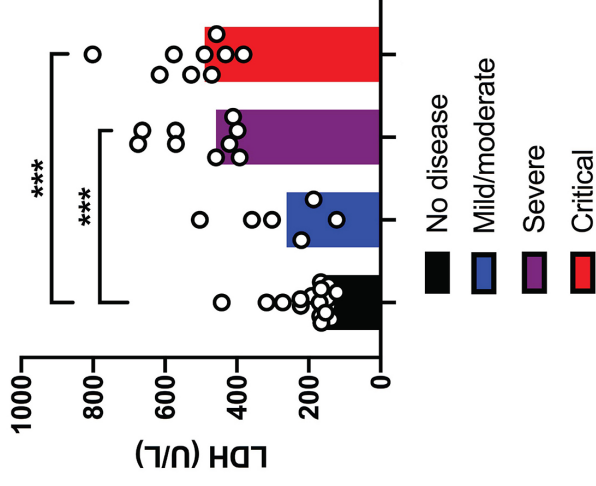**D**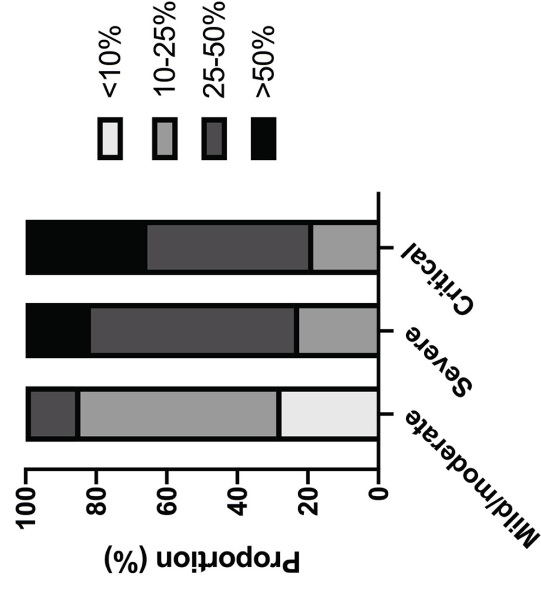

**A**

Gated on CD3+ T cells

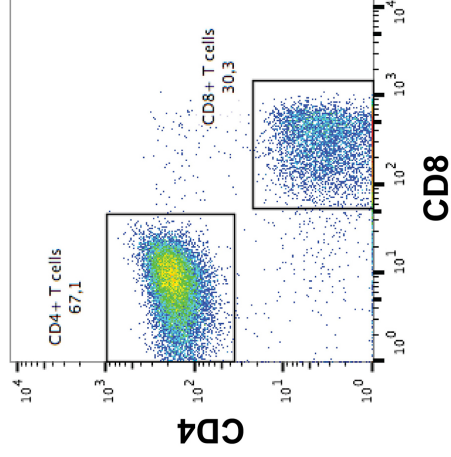

Gated on CD4+ T cells

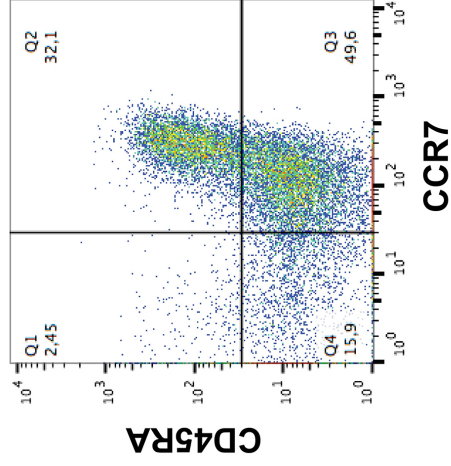

Gated on CD8+ T cells

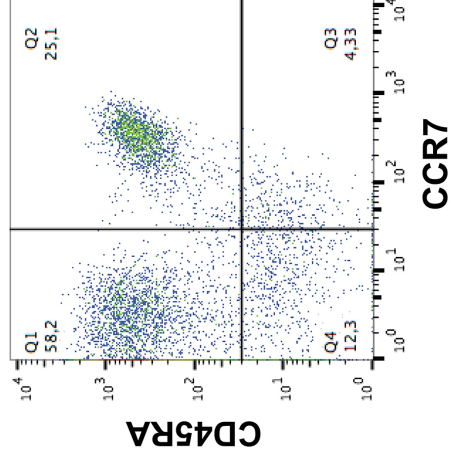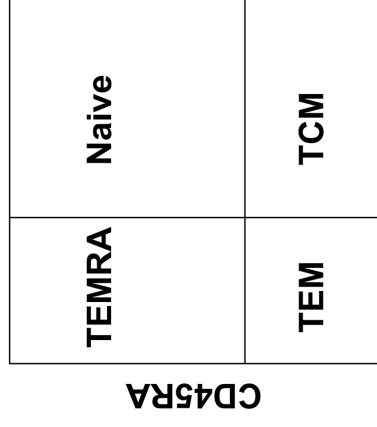

**B**

- No disease
- Mild/moderate
- Severe
- Critical

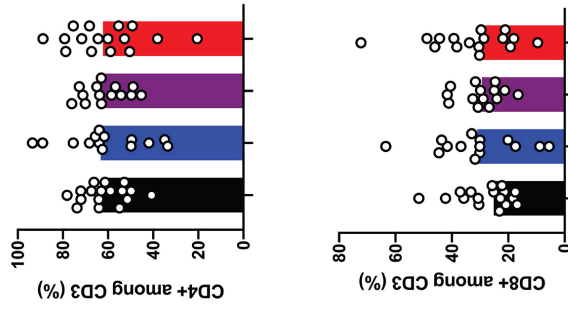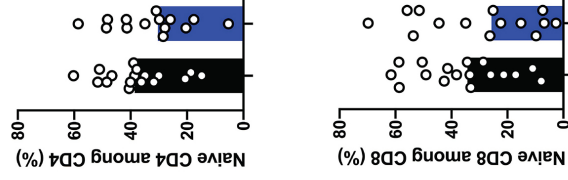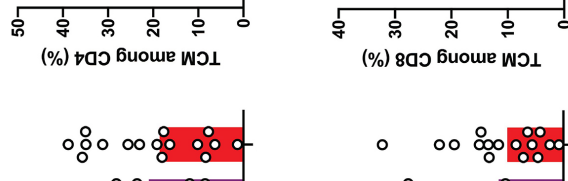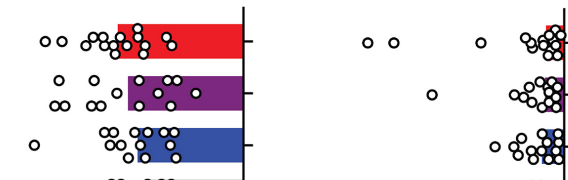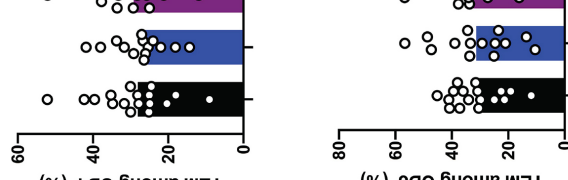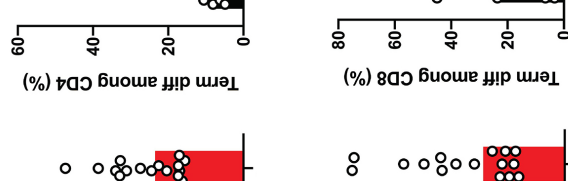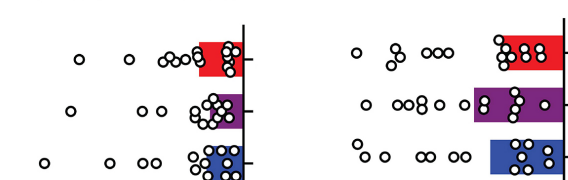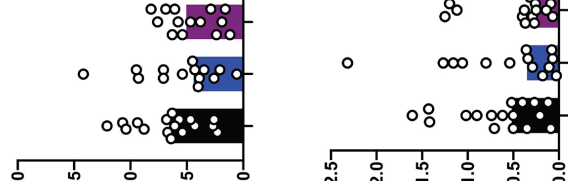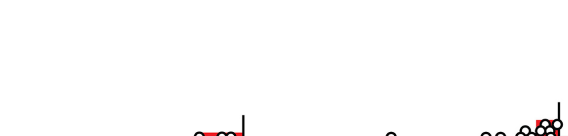

**A**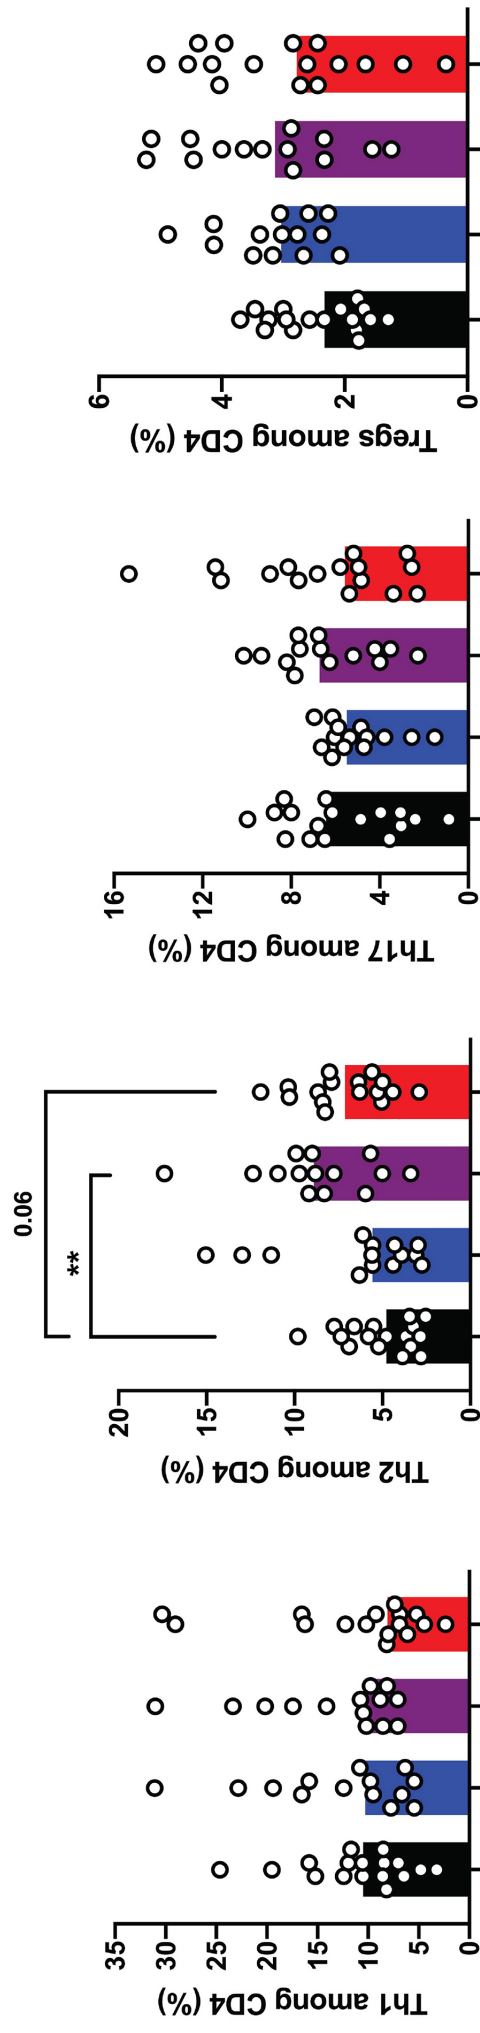**B**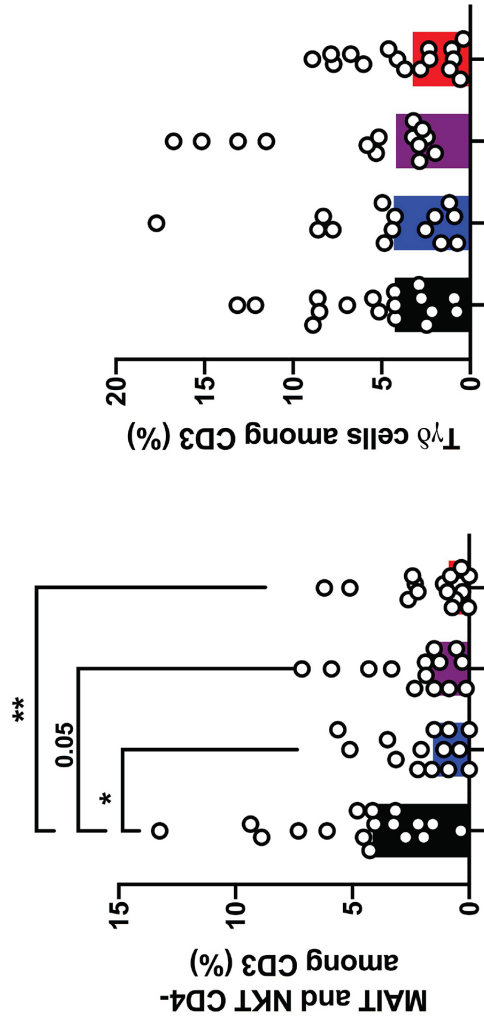

No disease  
 Mild/moderate  
 Severe  
 Critical

No disease  
 Mild/moderate  
 Severe  
 Critical

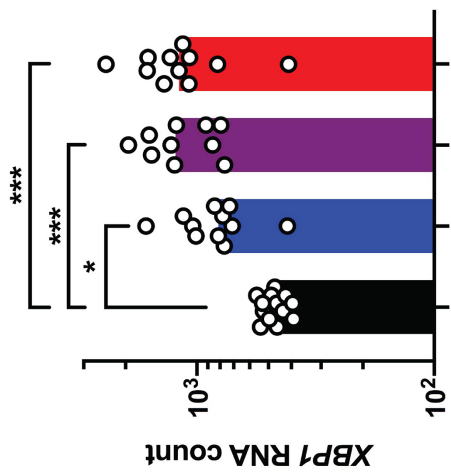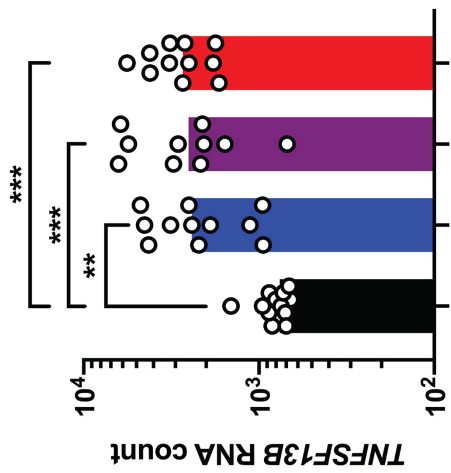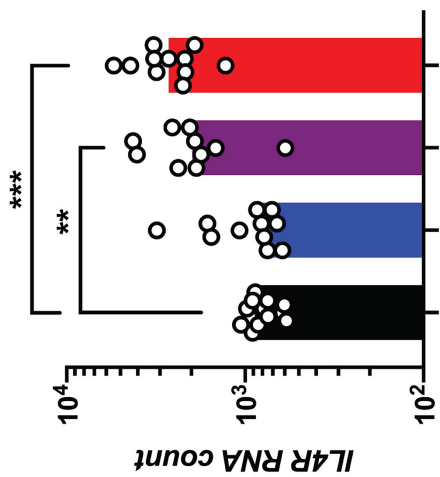

**A**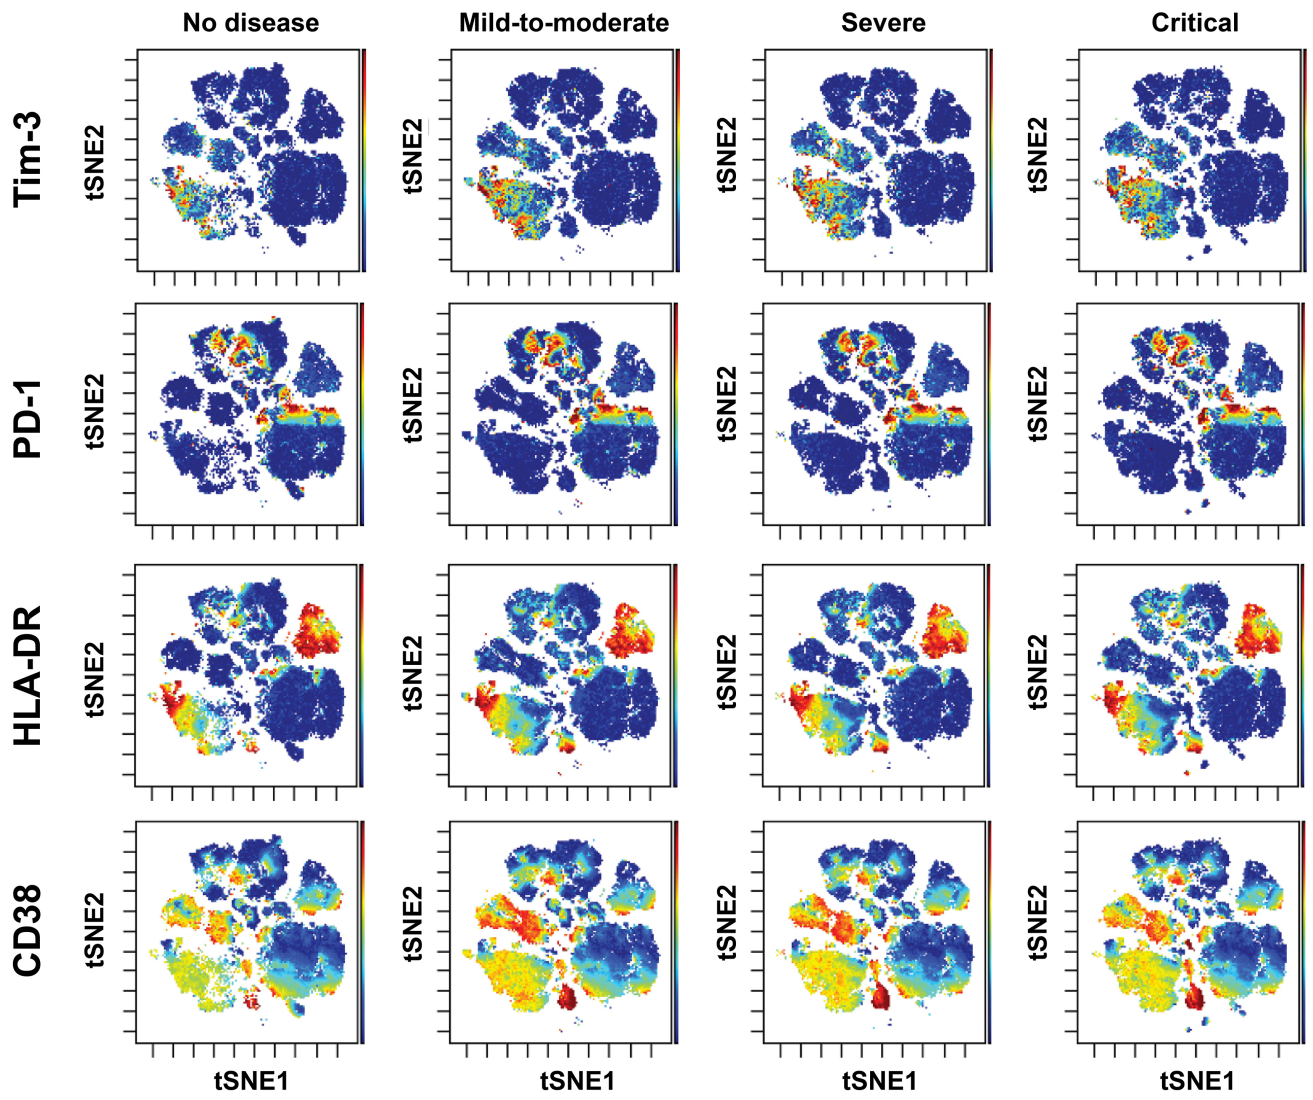**B**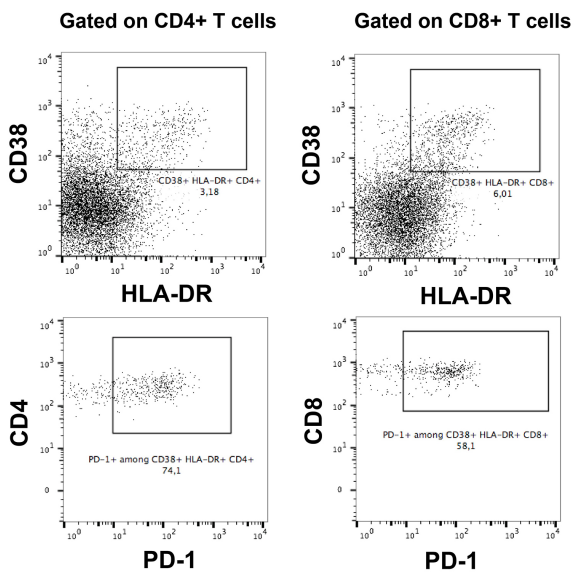**C**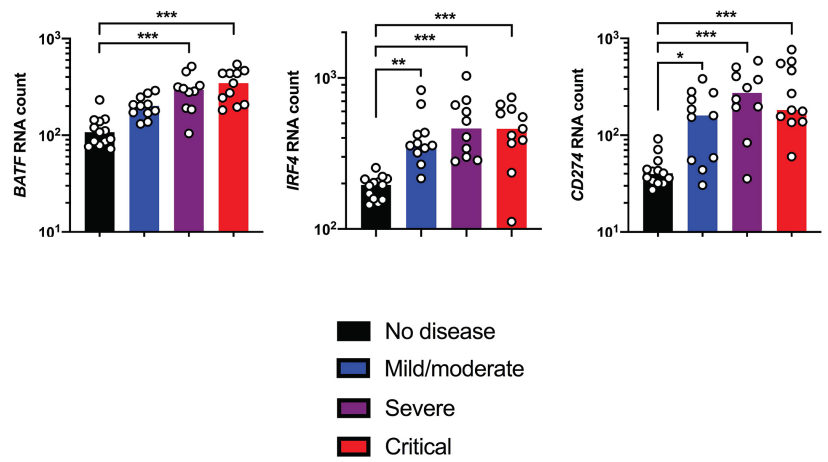

**A**

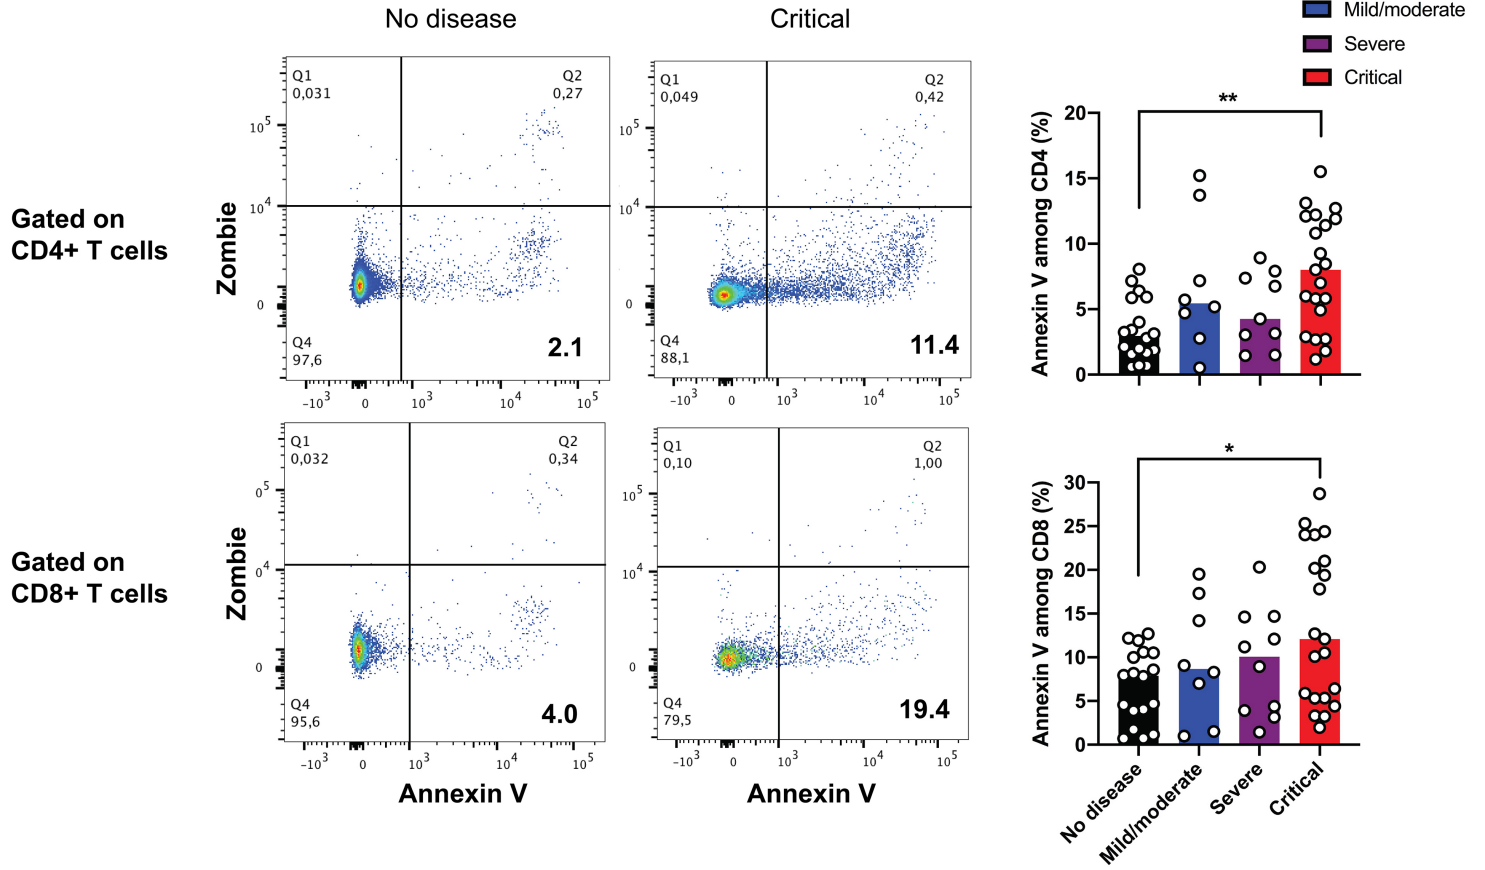

**B**

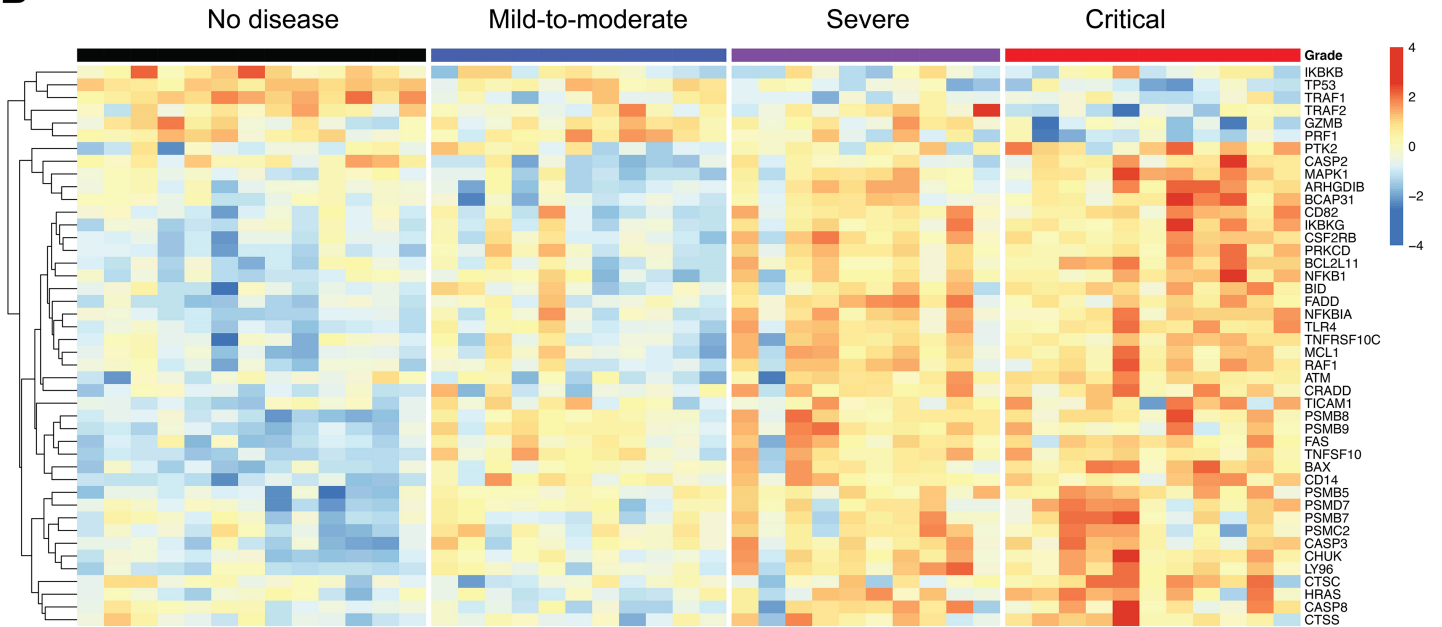

**A**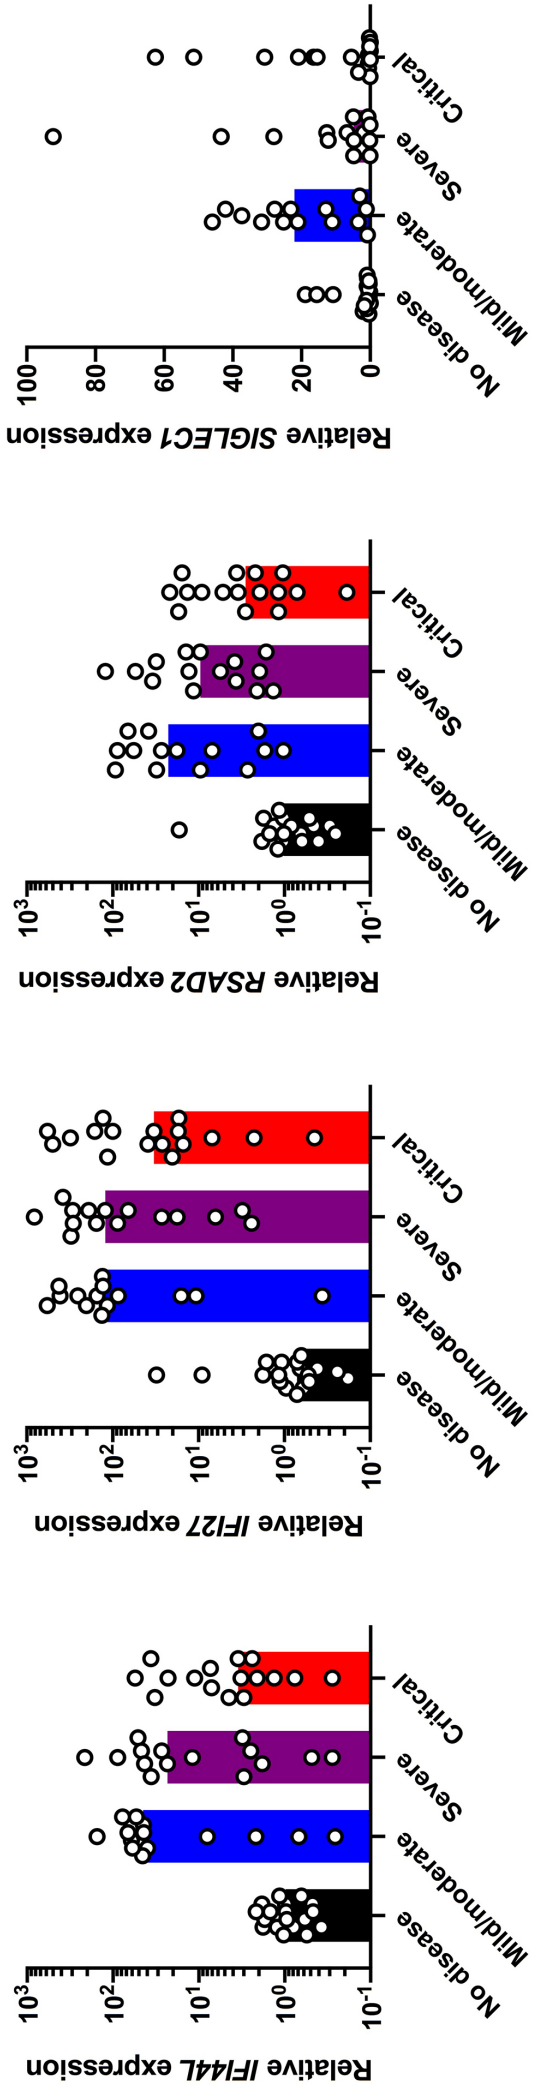**B**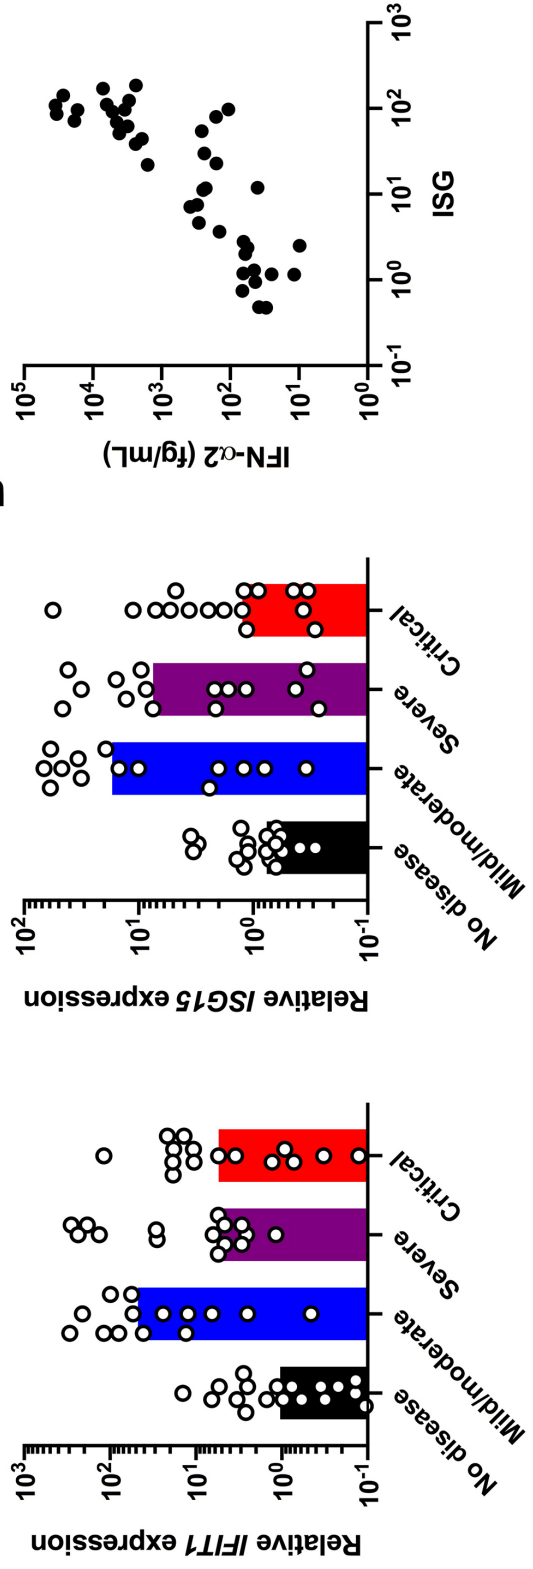

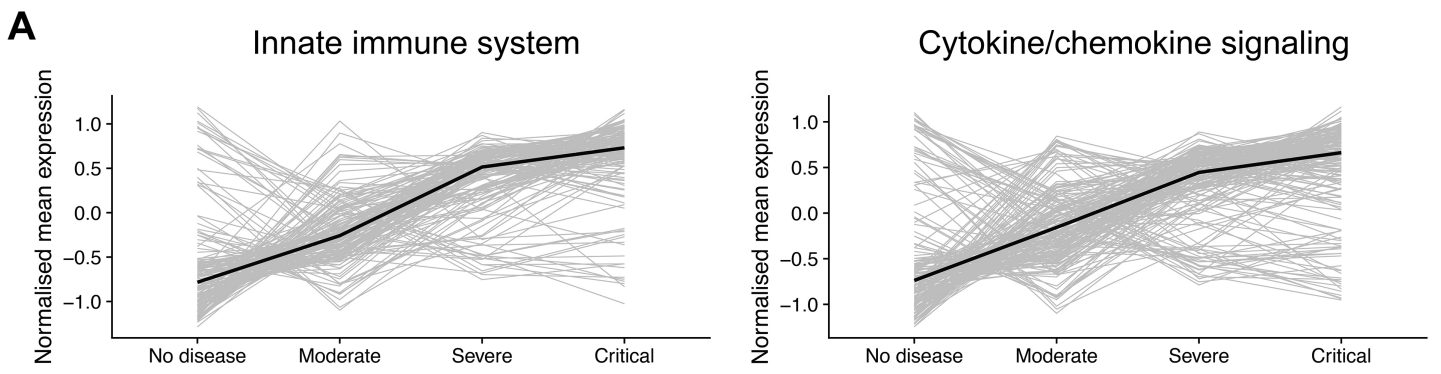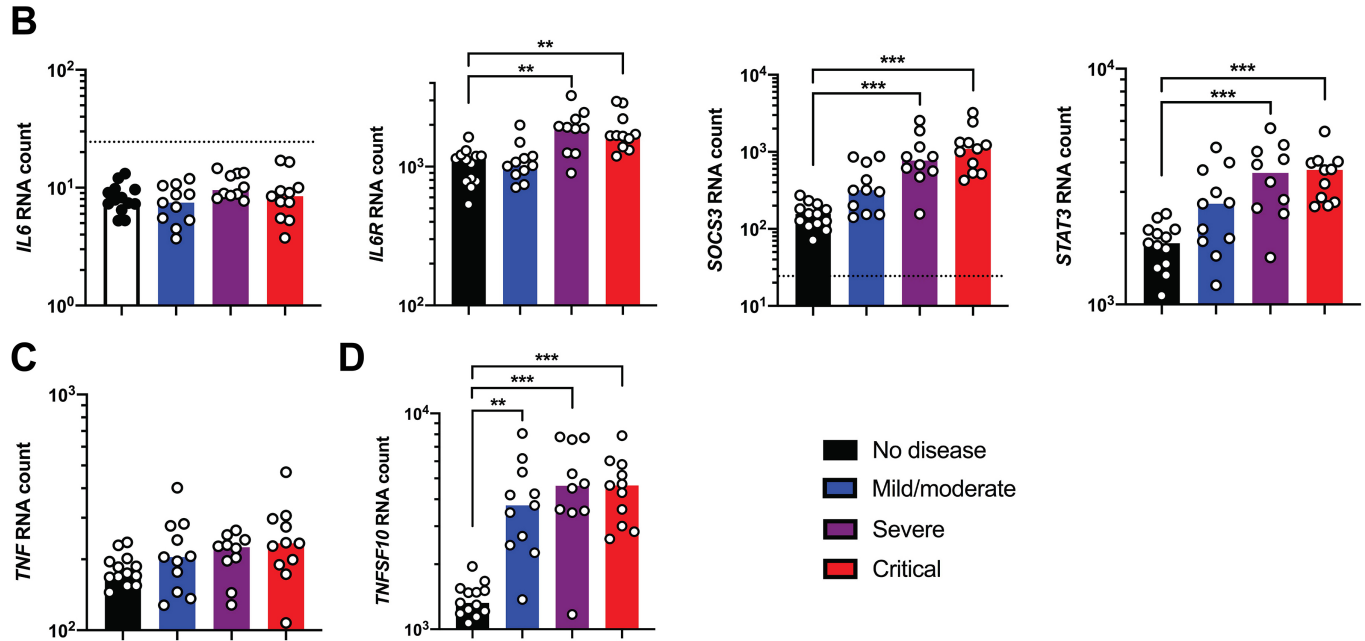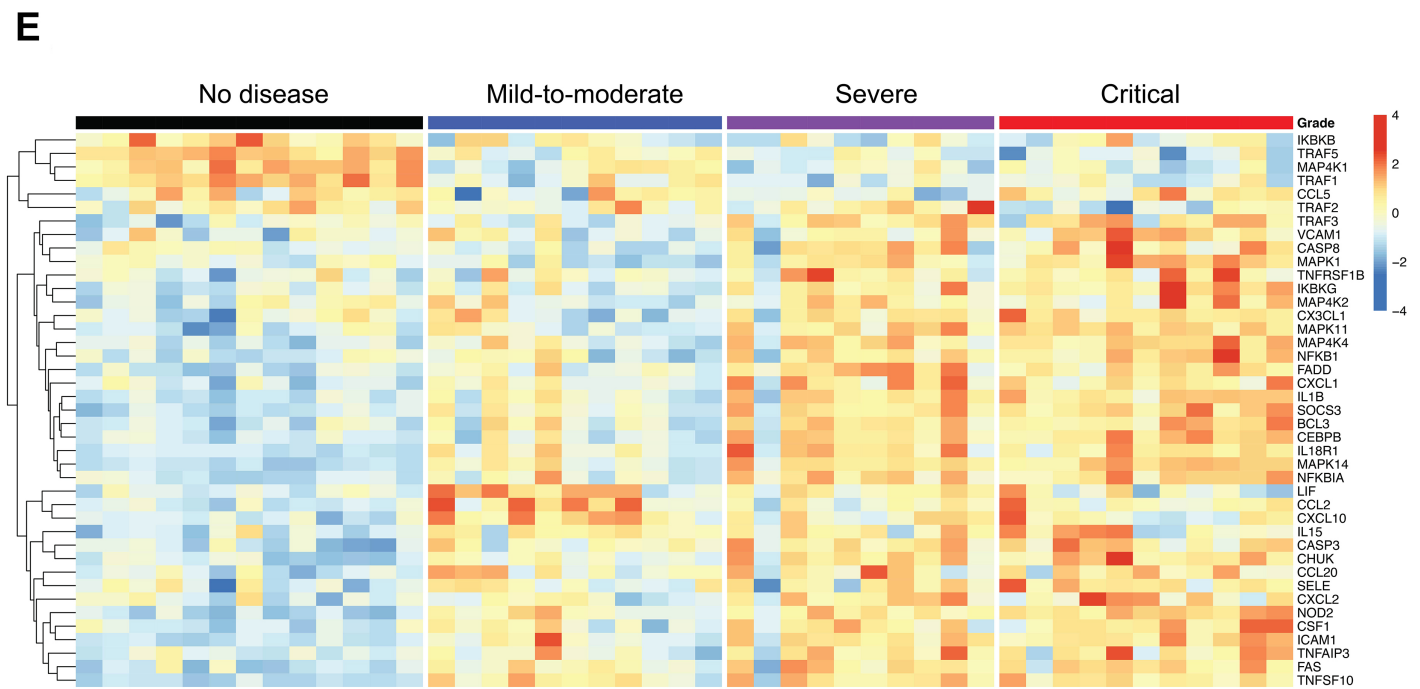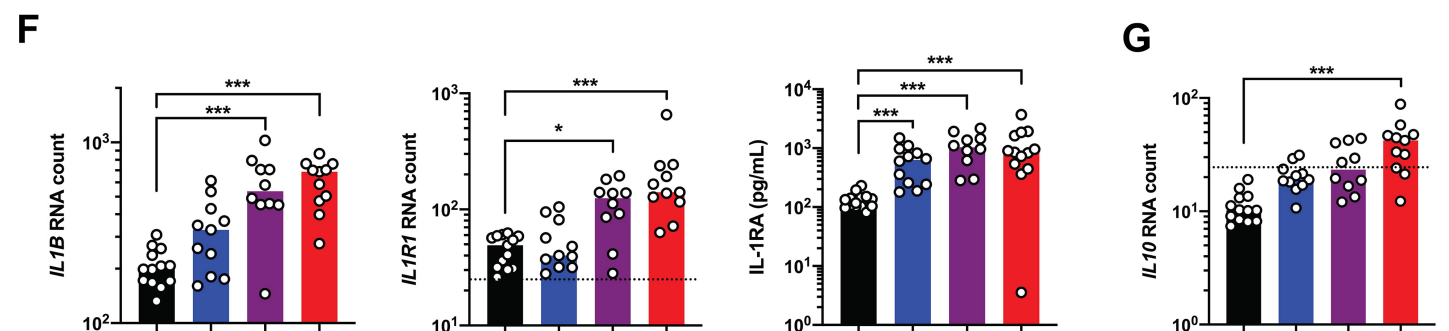





**A**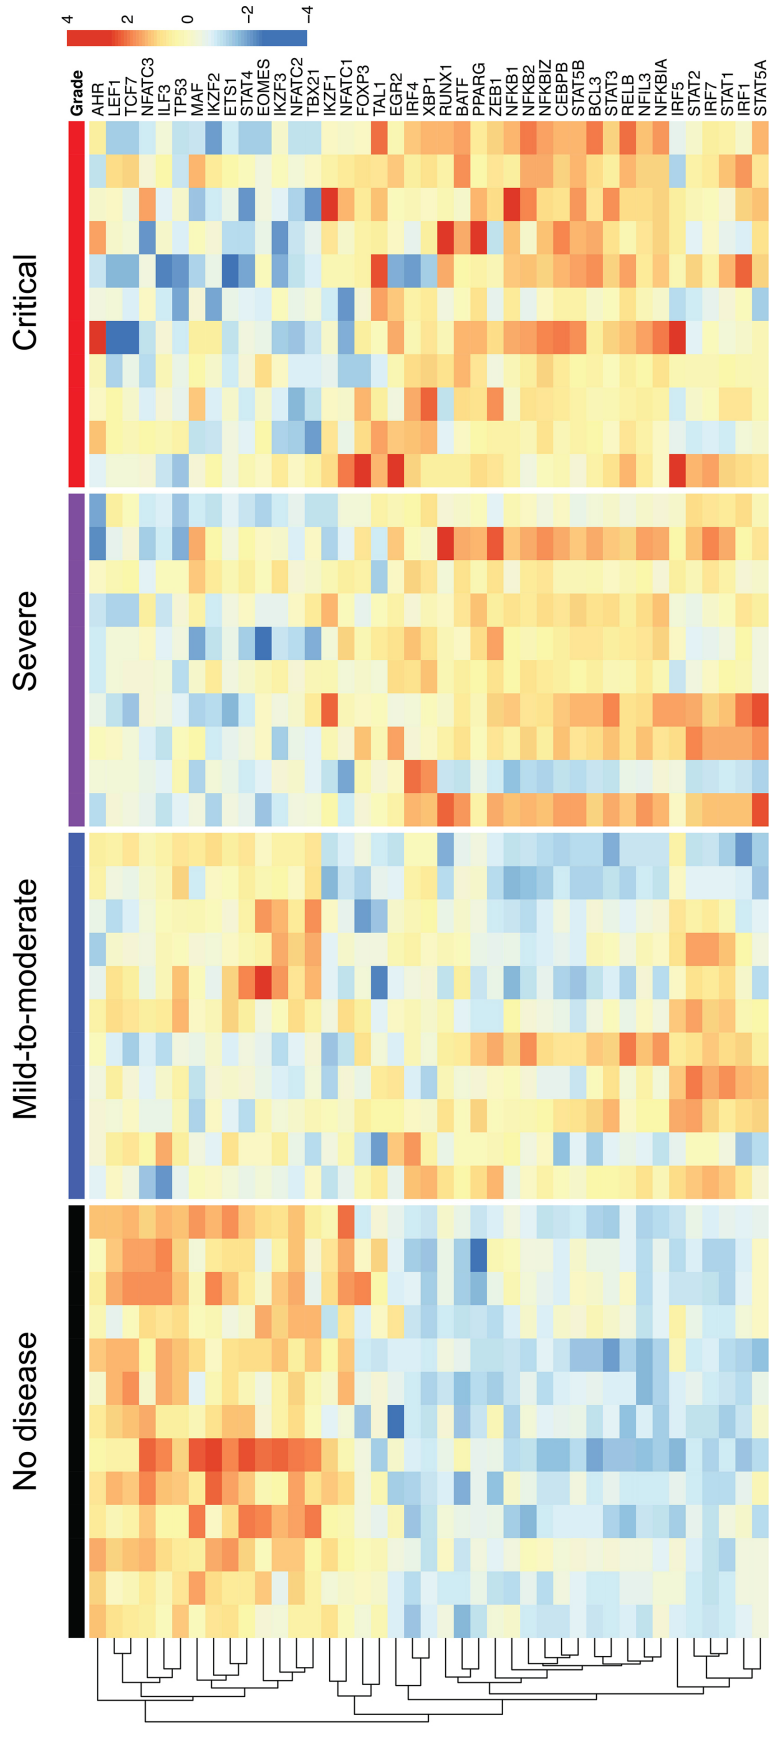**B**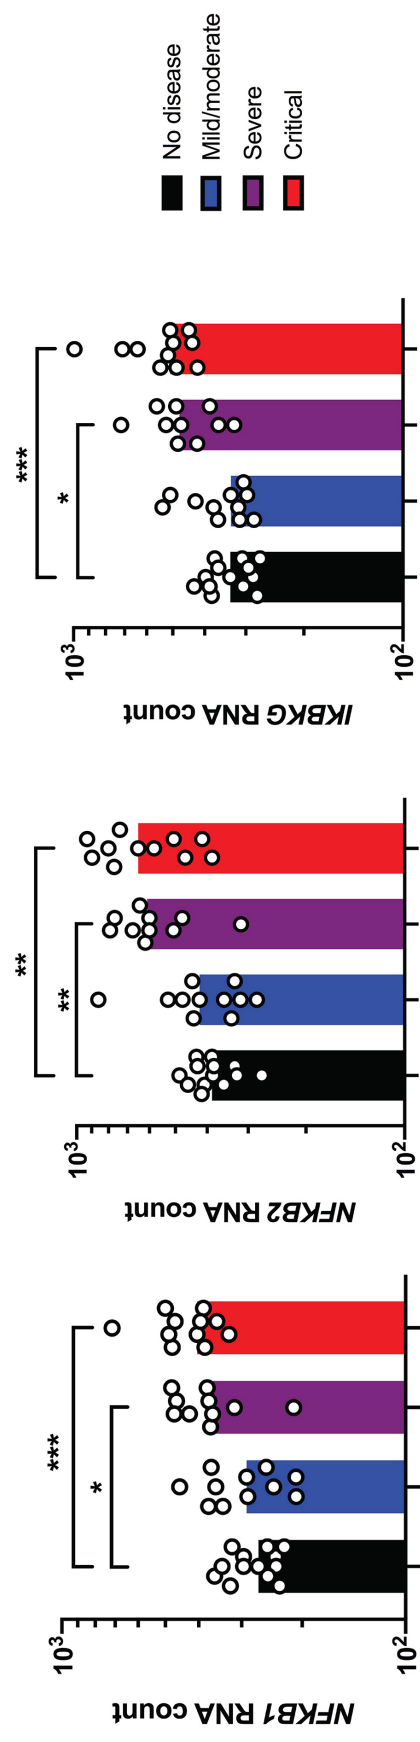

Supplement: Supplementary file [file 2020.04.19.20068015-2.pdf]
